# Supplementary material
Source: PubMed Central journal article supplement (PMC3374307)
Supplement: supp_112.138818_138818SI.pdf [file supp_112.138818_138818SI.pdf]

**Table S1 Primers**

| Purpose                             | Forward Primer                                    | Reverse Primer                            |
|-------------------------------------|---------------------------------------------------|-------------------------------------------|
| Check if D4A was retained after DSB | D4AGenomic2F:<br>5' -CCCTCAAATAAACGGGTTCTAATA- 3' | D4A5105:<br>5' -AACAAAAGTGCAGCGGAAAT- 3'  |
| Control Amplification               | K81-1F:<br>5' -ATGTCGGATTCGCCCCATGAG - 3'         | K81-555R:<br>5' -TTCCCGCCAGATAAATGGCC- 3' |
| Southern Probe to white gene        | w7728d:<br>5' -AAACACCCATCTGCCGAGCA - 3'          | w11678u:<br>5' -TCATCGCAGATCAGAAGCGG- 3'  |
| Inverse PCR of TD end               | w12546d:<br>5' -TATCAACGGAGCCATCTTCC - 3'         | w7514U:<br>5' -CAACTGAAGGCGGACATTG - 3'   |
| Inverse PCR of TD with transposon   | w8-817U:<br>5' -TAGAGTGCCGTTTACTGTGC- 3'          | w8-817d:<br>5' -TTCTCGTTGCTTCGAGAGAG- 3'  |

Sequences of *HeT-A* attachment to *D4A<sup>TD</sup>*:

Line 1: 5'-tgagttggggattggacatagatttagatattaatattaagagtaag

Line 2: 5'-ggggtgagtttgggtatggacgtggtgaattaattgaaattaatat

Line 3: 5'-atgtaaacataccgtgcaaaatgataatgttaccagtctatgtcactgt
